# Supplementary material for: Control of In Vivo Transport and Toxicity of Nanoparticles by Tea Melanin
Source: Hindawi journal article supplement (doi:10.1155/2012/746960), 2012-01-01
Supplement: f1 [file 746960.f1.docx]

Supporting Information

(Control of in vivo transport and toxicity of nanoparticles by tea melanin)

Yu-Shiun Chen, Meng-Yeng Hong, Andrei Aleksandrovich Onischuk, Jin-Chern Chiou, Irina V. Sorokina, Tatiana Tolstikova, and G. Steve Huang

Figure S1


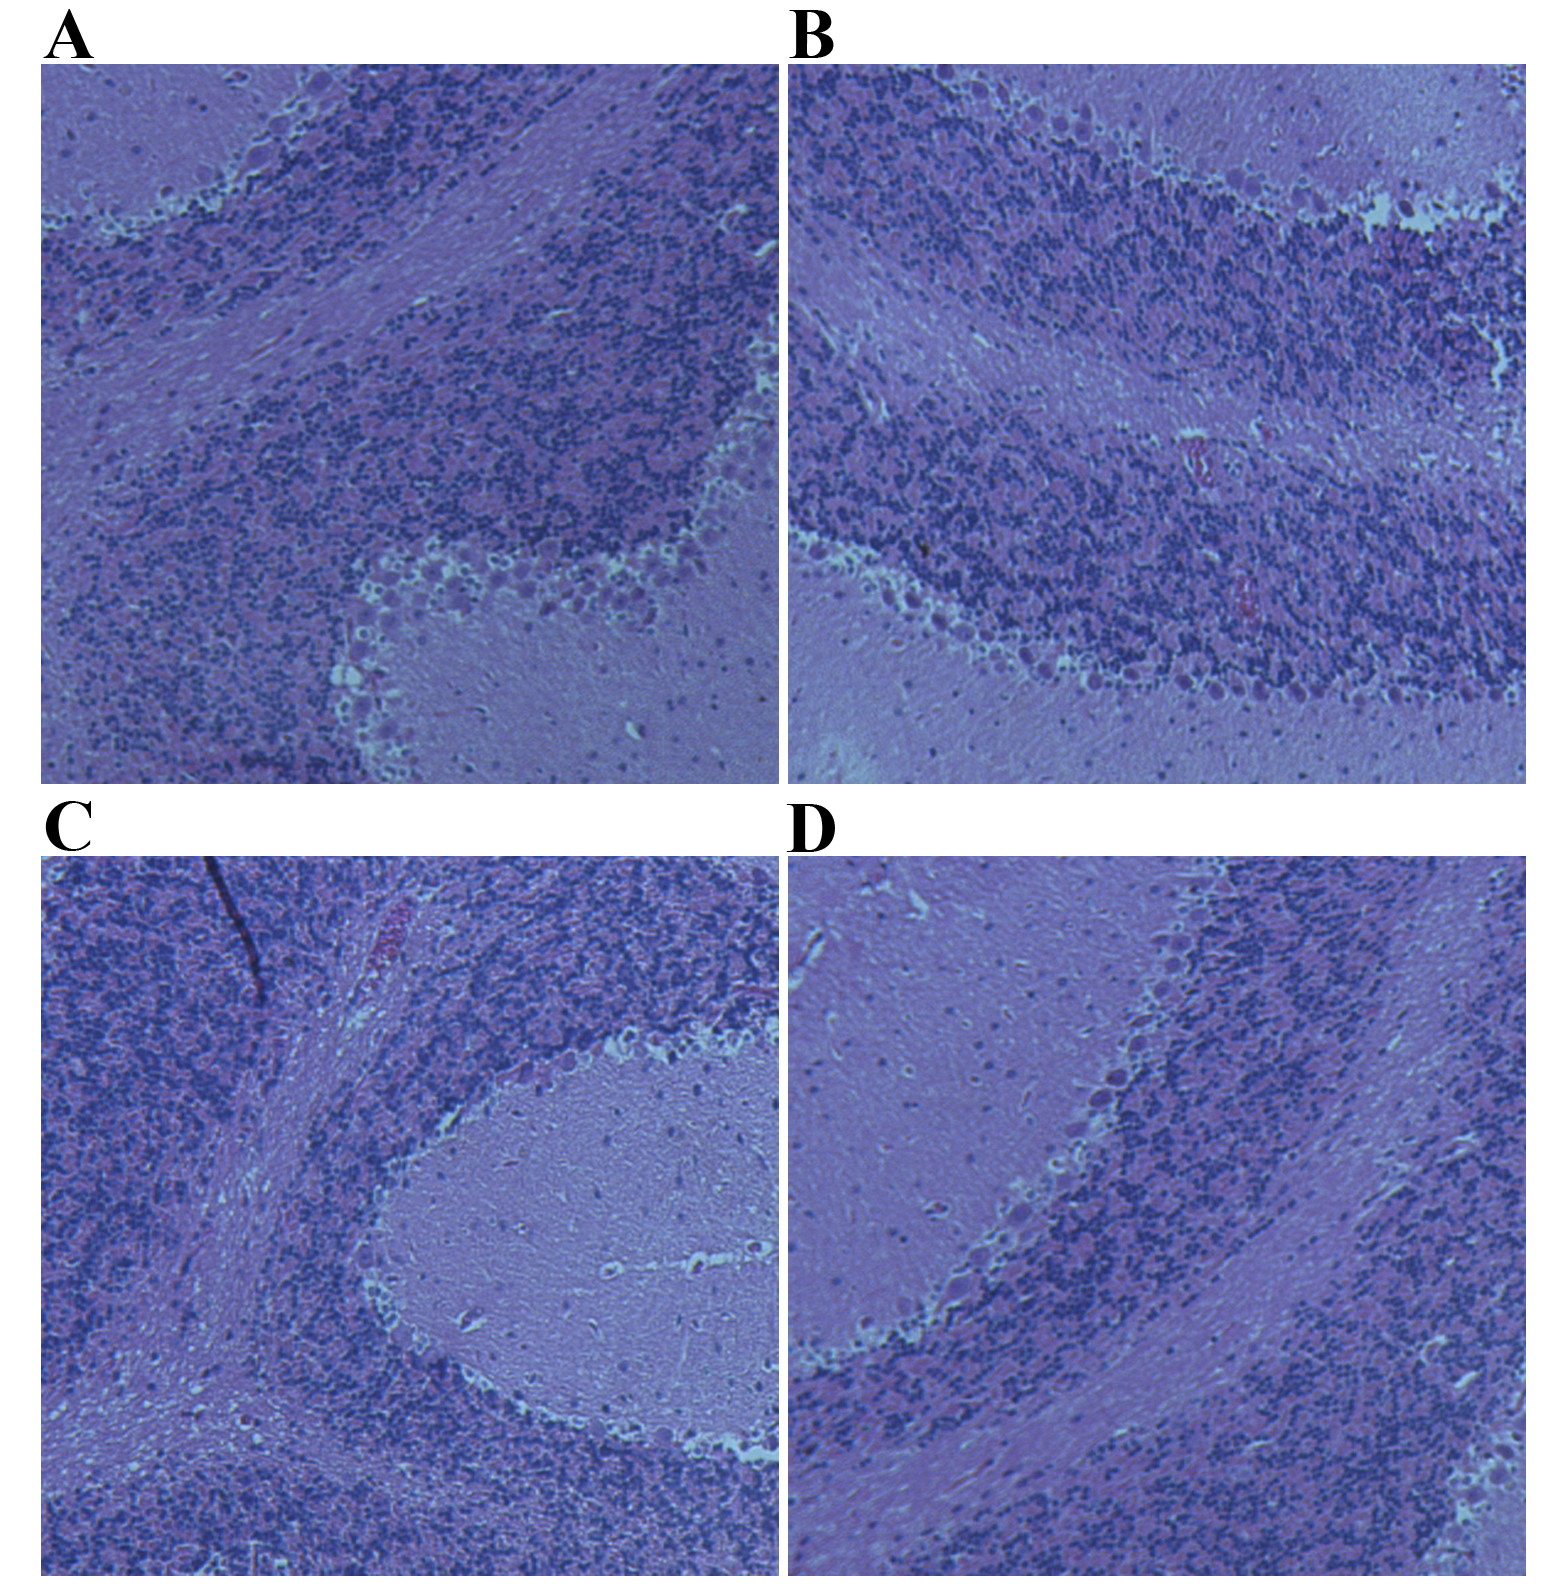


Hematoxylin-Eosin staining of hippocampus isolated from mice in (A) the control group, (B) the 17-nm GNP-treated group, (C) the 37-nm GNP-treated group, and (D) the melanin pretreatment plus 17-nm GNP-treated group.
